# Supplementary material
Source: publisher figshare collection journal article supplement (https://acs.figshare.com/ndownloader/files/15579920)
Supplement: Supplementary file 1 [file 15579920]

## Dense Charge Accumulation in MXene with Hydrate Melt Electrolyte

Kijae Kim,<sup>†</sup> Yasunobu Ando,<sup>‡,§</sup> Akira Sugahara,<sup>†</sup> Seongjae Ko,<sup>†</sup> Yuki Yamada,<sup>†,‡</sup> Minoru Otani,<sup>‡,§</sup>

Masashi Okubo,<sup>†,‡</sup> and Atsuo Yamada<sup>\*,†,‡</sup>

<sup>†</sup>Department of Chemical System Engineering, School of Engineering, The University of Tokyo, 7-3-1, Hongo, Bunkyo-ku, Tokyo 113-8656, Japan

<sup>‡</sup>Elemental Strategy Initiative for Catalysts & Batteries (ESICB), Kyoto University, Nishikyo-ku, Kyoto 615-8510, Japan

<sup>§</sup>CD-FMat, National Institute of Advanced Industrial Science and Technology (AIST), Umezono 1-1-1, Tsukuba, Ibaraki 305-8568, Japan

\*Corresponding author: yamada@chemsys.t.u-tokyo.ac.jp

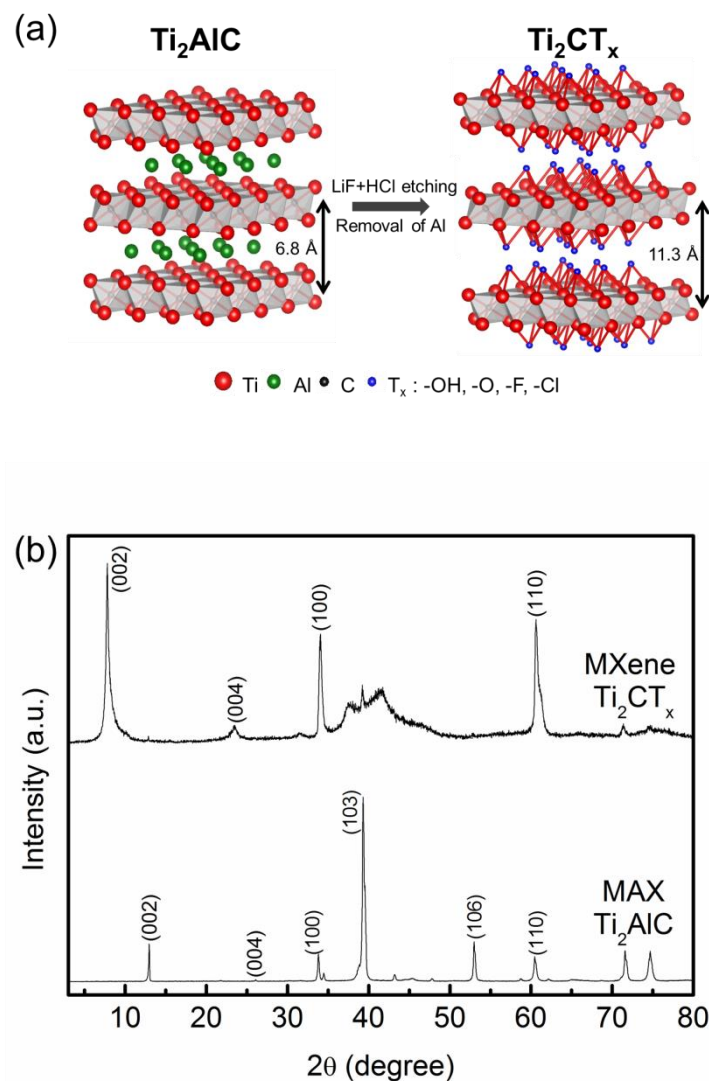

**Figure S1.** (a) Schematic illustration of the synthesis of  $\text{Ti}_2\text{CT}_x$ .  $\text{LiF}/\text{HCl}$  treatment removes Al layer from  $\text{Ti}_2\text{AlC}$ , and a remaining  $\text{Ti}_2\text{C}$  layer is functionalized by surface termination groups such as -F, -Cl, -OH, or -O. (b) XRD patterns of  $\text{Ti}_2\text{AlC}$  and  $\text{Ti}_2\text{CT}_x$ . The interlayer distance increases after the transformation from  $\text{Ti}_2\text{AlC}$  to  $\text{Ti}_2\text{CT}_x$  due to the attachment of the surface termination groups.

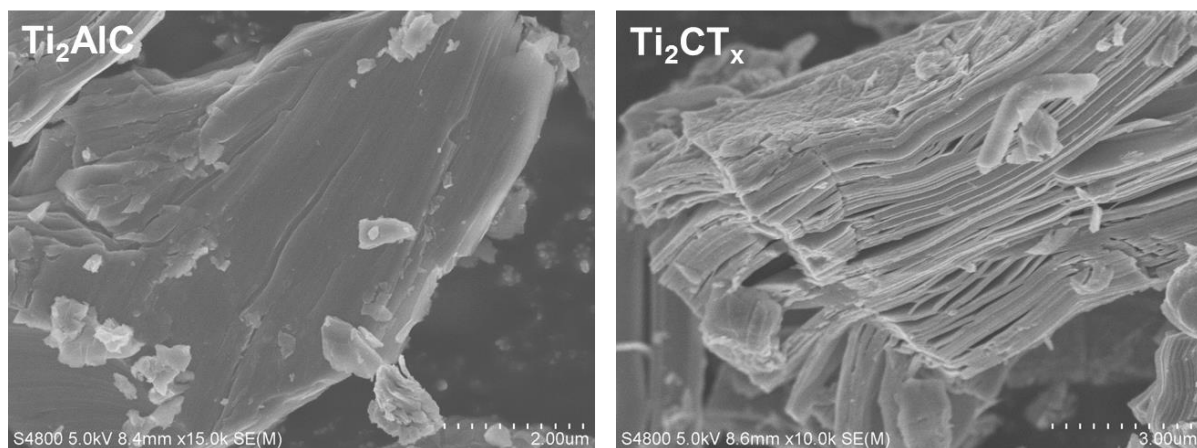

**Figure S2.** SEM images of  $\text{Ti}_2\text{AlC}$  and  $\text{Ti}_2\text{CT}_x$ . The particulate morphology of  $\text{Ti}_2\text{AlC}$  is transformed to stacked-nanosheet morphology after  $\text{LiF}/\text{HCl}$  treatment.

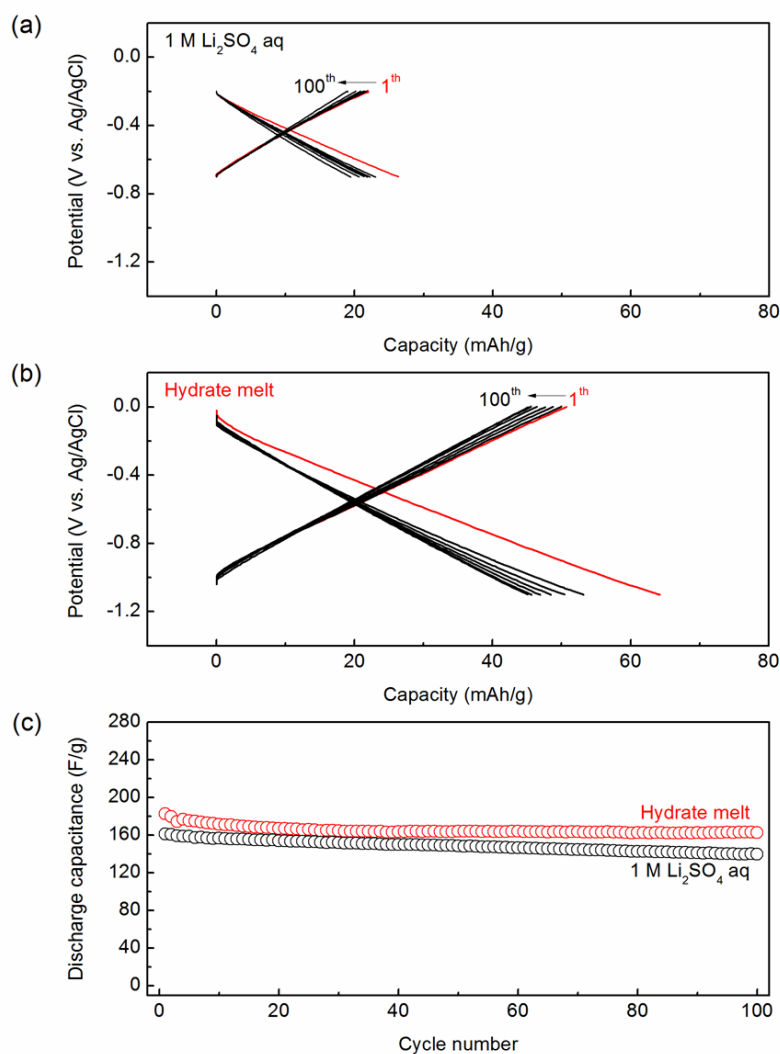

**Figure S3.** Galvanostatic charge/discharge curves of  $\text{Ti}_2\text{CT}_x$  with (a) 1.0 M  $\text{Li}_2\text{SO}_4$  aqueous electrolyte and (b) a hydrate melt at a current rate of 0.2 A/g during 100 cycles. (c) Cycle stability (cycle number vs. discharge capacitance) of  $\text{Ti}_2\text{CT}_x$  with a 1.0 M  $\text{Li}_2\text{SO}_4$  aqueous electrolyte and a hydrate-melt electrolyte at a specific current of 0.2 A/g. Discharge capacitance  $C$  (F/g) for linear charge-discharge curve is defined as  $C = I\Delta t/m\Delta V$ , where  $I$  is current intensity,  $\Delta t$  is discharge time,  $m$  is mass, and  $\Delta V$  is voltage change of the electrode versus a reference electrode.

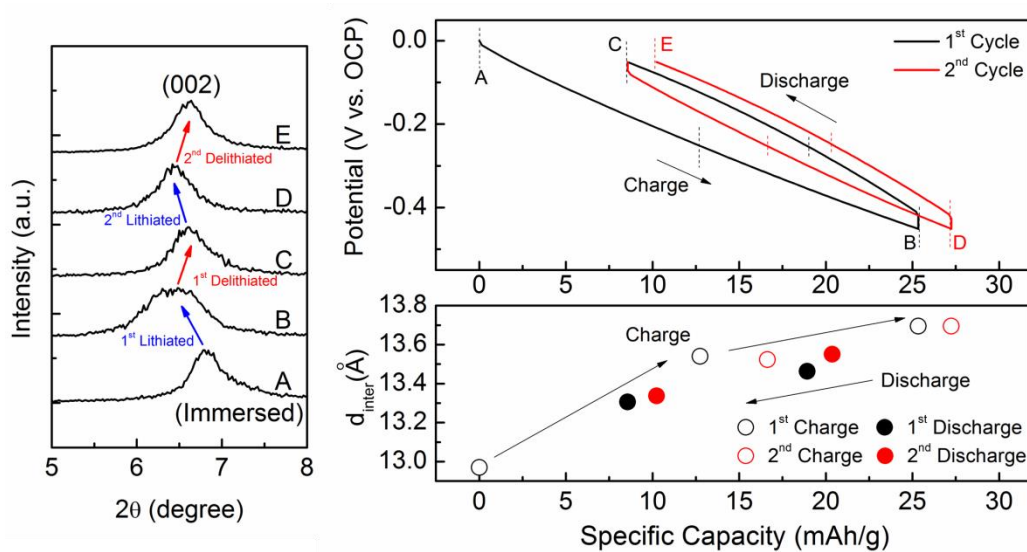

**Figure S4.** Ex-situ XRD patterns (Left), and the interlayer distance  $d_{\text{inter}}$  (right) of  $\text{Ti}_2\text{CT}_x$  upon charging/discharging with a 1.0 M  $\text{Li}_2\text{SO}_4$  aqueous electrolyte during the first and second cycles.

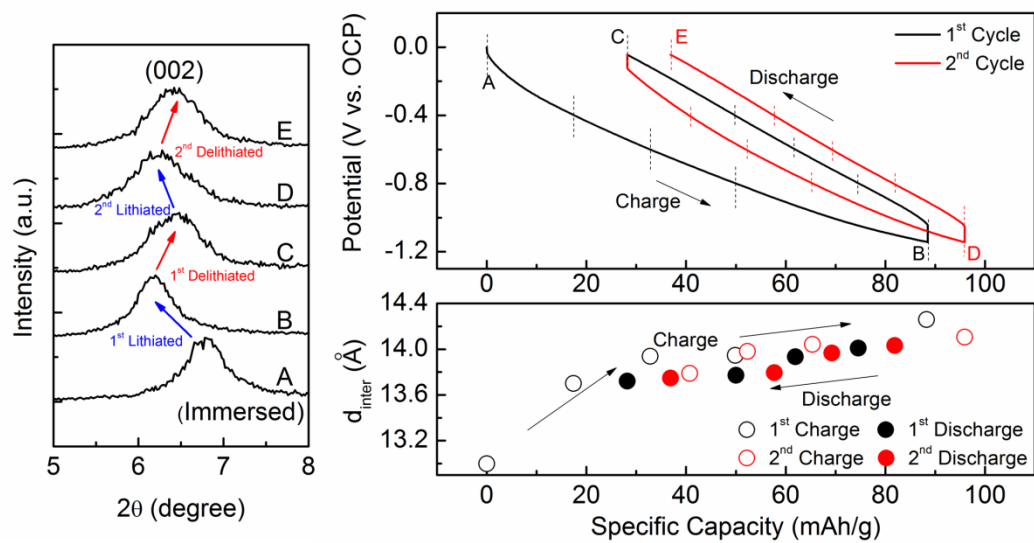

**Figure S5.** Ex-situ XRD patterns (Left), and the interlayer distance  $d_{\text{inter}}$  (right) of  $\text{Ti}_2\text{CT}_x$  upon charging/discharging with a hydrate-melt electrolyte during the first and second cycles.

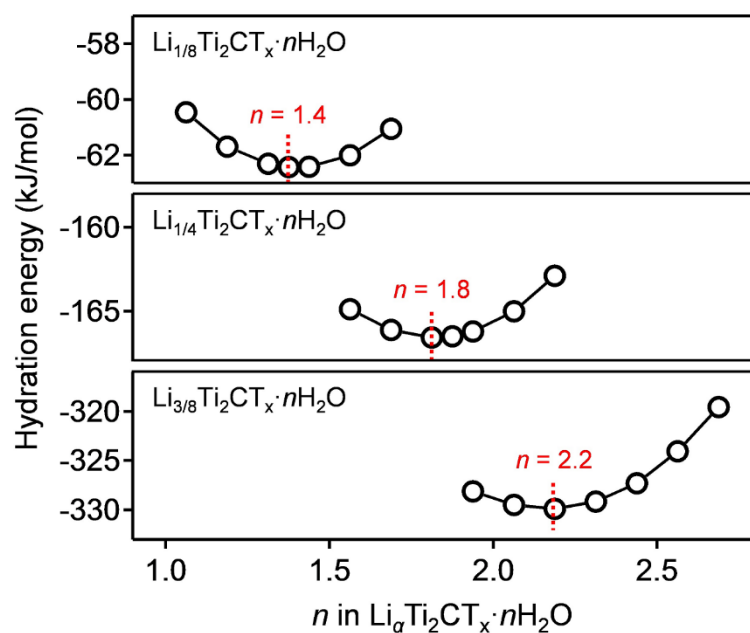

**Figure S6.** 3D-RISM optimization of hydration of  $\text{Li}^+$  intercalated into  $\text{Ti}_2\text{CT}_x$ . Hydration energy of  $\text{Li}^+$ -intercalated MXenes, *i.e.*,  $\text{Li}_\alpha\text{Ti}_2\text{CT}_x \cdot n\text{H}_2\text{O}$  ( $\alpha = 1/8, 1/4, \text{ and } 3/8$ ) as a function of a hydration number  $n$ . During the optimization, the interlayer distance between  $\text{Ti}_2\text{CT}_x$  nanosheets was fixed at the experimental value in Figure S4. The optimal hydration was obtained at  $n = 1.4, 1.8, \text{ and } 2.2$  for  $\alpha = 1/8, 1/4, \text{ and } 3/8$ , respectively.

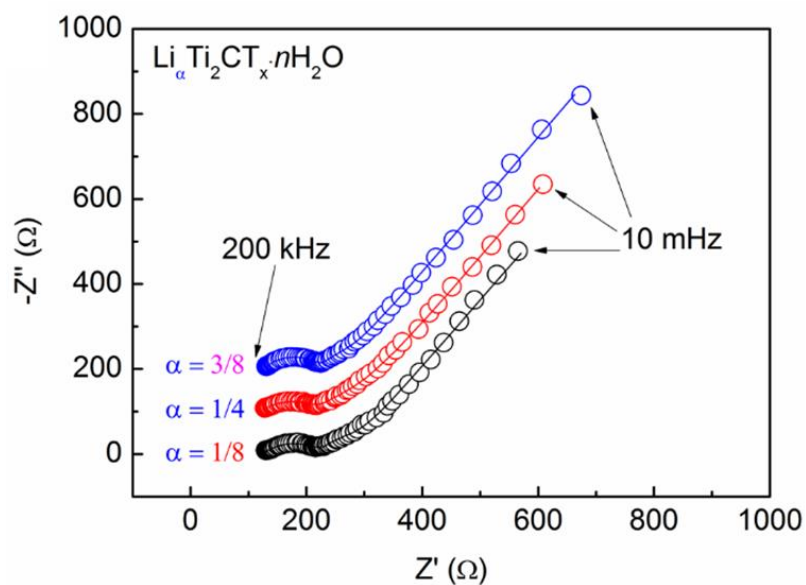

**Figure S7.** Nyquist plots for  $\text{Ti}_2\text{CT}_x$  with a hydrate-melt electrolyte at different states of charge (-0.5 V, -0.8 V, and -1.1 V vs. OCP) corresponding to  $\text{Li}_\alpha\text{Ti}_2\text{CT}_x \cdot n\text{H}_2\text{O}$  ( $\alpha = 1/8, 1/4$ , and  $3/8$ ). Empty circles: experimental, solid lines: fitting.



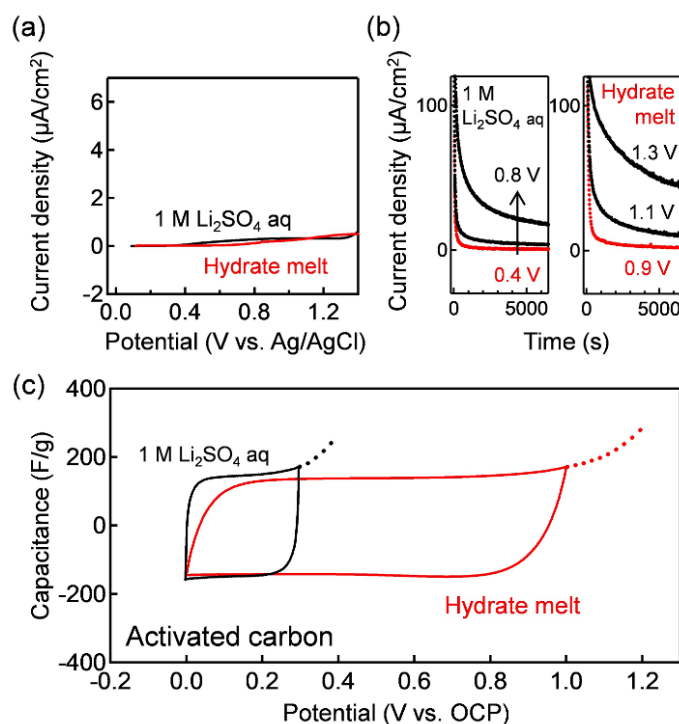

**Figure S8.** (a) Anodic linear sweep voltammetry of a 1 M  $\text{Li}_2\text{SO}_4$  aqueous electrolyte and a hydrate-melt electrolyte with a Ti electrode at a sweep rate of 0.1 mV/s. (b) Chronoamperometry at various applied potentials vs. Ag/AgCl in a 1 M  $\text{Li}_2\text{SO}_4$  aqueous electrolyte and a hydrate-melt electrolyte with activated carbon. Red lines indicate negligible steady-state leak current, which determines a cut-off voltage for each system. (c) Cyclic voltammetry curves of activated carbon with a 1.0 M  $\text{Li}_2\text{SO}_4$  aqueous electrolyte (black line) and a hydrate-melt electrolyte (red line) at a scan rate of 0.5 mV/s. Open circuit potentials (OCP) are 0.15 V vs. Ag/AgCl for a 1.0 M  $\text{Li}_2\text{SO}_4$  aqueous electrolyte and  $-0.05$  V vs. Ag/AgCl for the hydrate-melt electrolyte, respectively. Dotted lines are linear sweep voltammetry curves for a cathodic scan exceeding a stable electrochemical window.

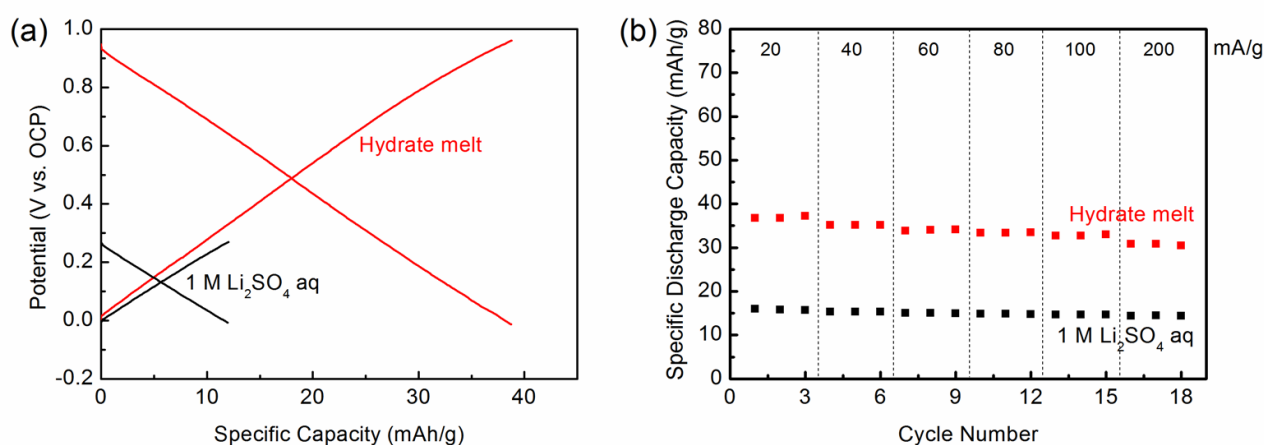

**Figure S9.** (a) Galvanostatic charge/discharge curves of activated carbon at a constant specific current of 30 mA/g with a 1.0 M  $\text{Li}_2\text{SO}_4$  aqueous electrolyte (black lines), and with a hydrate-melt electrolyte (red lines). (b) Rate capability of activated carbon at various specific currents of 20-200 mA/g with a 1.0 M  $\text{Li}_2\text{SO}_4$  aqueous electrolyte (black) and with a hydrate-melt electrolyte (red).

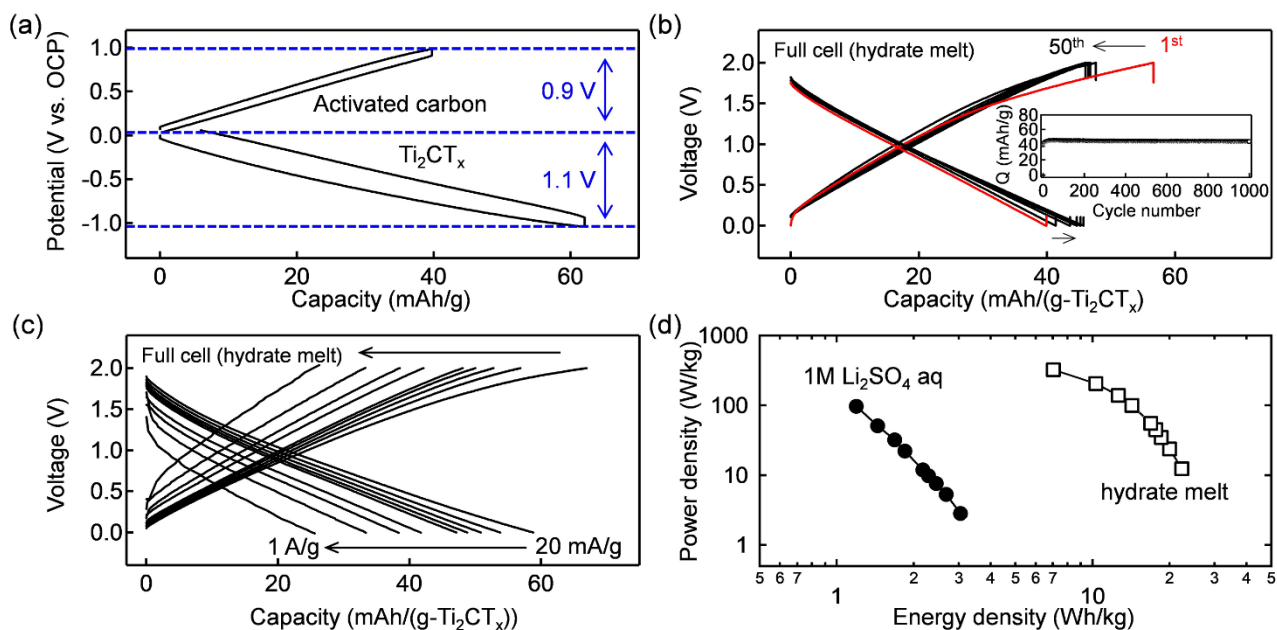

**Figure S10.** (a) Potential profiles of activated carbon and  $\text{Ti}_2\text{CT}_x$  in a hydrate-melt electrolyte at a specific current of 30 mA/g during the second cycle. (b) Voltage profiles of a capacity-balanced full-cell consisting of a  $\text{Ti}_2\text{CT}_x$  negative electrode and an activated carbon positive electrode with a hydrate-melt electrolyte. Cell was cycled at a specific current of 100 mA/g in the voltage range of 2.0 – 0.0 V. Inset shows the cycle stability during 1000 cycles. (c) Rate capability with various specific currents. All the capacity values are based on the weight of  $\text{Ti}_2\text{CT}_x$ . (d) Ragone plots of the  $\text{Ti}_2\text{CT}_x$ /AC full-cell with a hydrate-melt electrolyte (empty squares) and a 1.0 M  $\text{Li}_2\text{SO}_4$  aqueous electrolyte (filled circles). Energy and power densities are calculated based on the total weight of the positive and negative electrodes.

**Table S1.** Elemental analysis results of  $\text{Ti}_2\text{CT}_x$  before and after drying at 200°C.

|                                                                                                                  | C/wt% | H/wt% | F/wt% | Cl/wt% |
|------------------------------------------------------------------------------------------------------------------|-------|-------|-------|--------|
| Exp. $\text{Ti}_2\text{CT}_x$ before drying                                                                      | 6.15  | 1.34  | 6.54  | 7.94   |
| Cal. for $\text{Ti}_2\text{C}(\text{OH})\text{O}_{0.3}\text{F}_{0.6}\text{Cl}_{0.4} \cdot 0.4\text{H}_2\text{O}$ | 7.39  | 1.11  | 7.02  | 8.74   |
| Exp. for $\text{Ti}_2\text{CT}_x$ after drying                                                                   | 6.98  | 0.58  | 6.76  | 9.01   |
| Cal. for $\text{Ti}_2\text{C}(\text{OH})\text{O}_{0.3}\text{F}_{0.6}\text{Cl}_{0.4}$                             | 7.74  | 0.64  | 7.34  | 9.14   |

**Table S2.** Energy dispersive X-ray spectroscopy analysis of  $\text{Ti}_2\text{AlC}$  and  $\text{Ti}_2\text{CT}_x$ .

|                          | Ti<br>atomic% | C<br>atomic% | Al<br>atomic% | O<br>atomic% | F<br>atomic% | Cl<br>atomic% |
|--------------------------|---------------|--------------|---------------|--------------|--------------|---------------|
| $\text{Ti}_2\text{AlC}$  | 52.99         | 26.45        | 20.56         | -            | -            | -             |
| $\text{Ti}_2\text{CT}_x$ | 42.49         | 22.91        | 0.93          | 17.04        | 8.46         | 8.18          |
